# Supplementary material for: Xanthine oxidase inhibitor ameliorates postischemic renal injury in mice by promoting resynthesis of adenine nucleotides
Source: JCI journal article supplement (doi:10.1172/jci.insight.124816), 2019-11-13
Supplement: sd1 [file 1]

## Supplementary information.

Supplementary Figures and Tables are provided as Supplementary information.

### [Supplementary Figures]

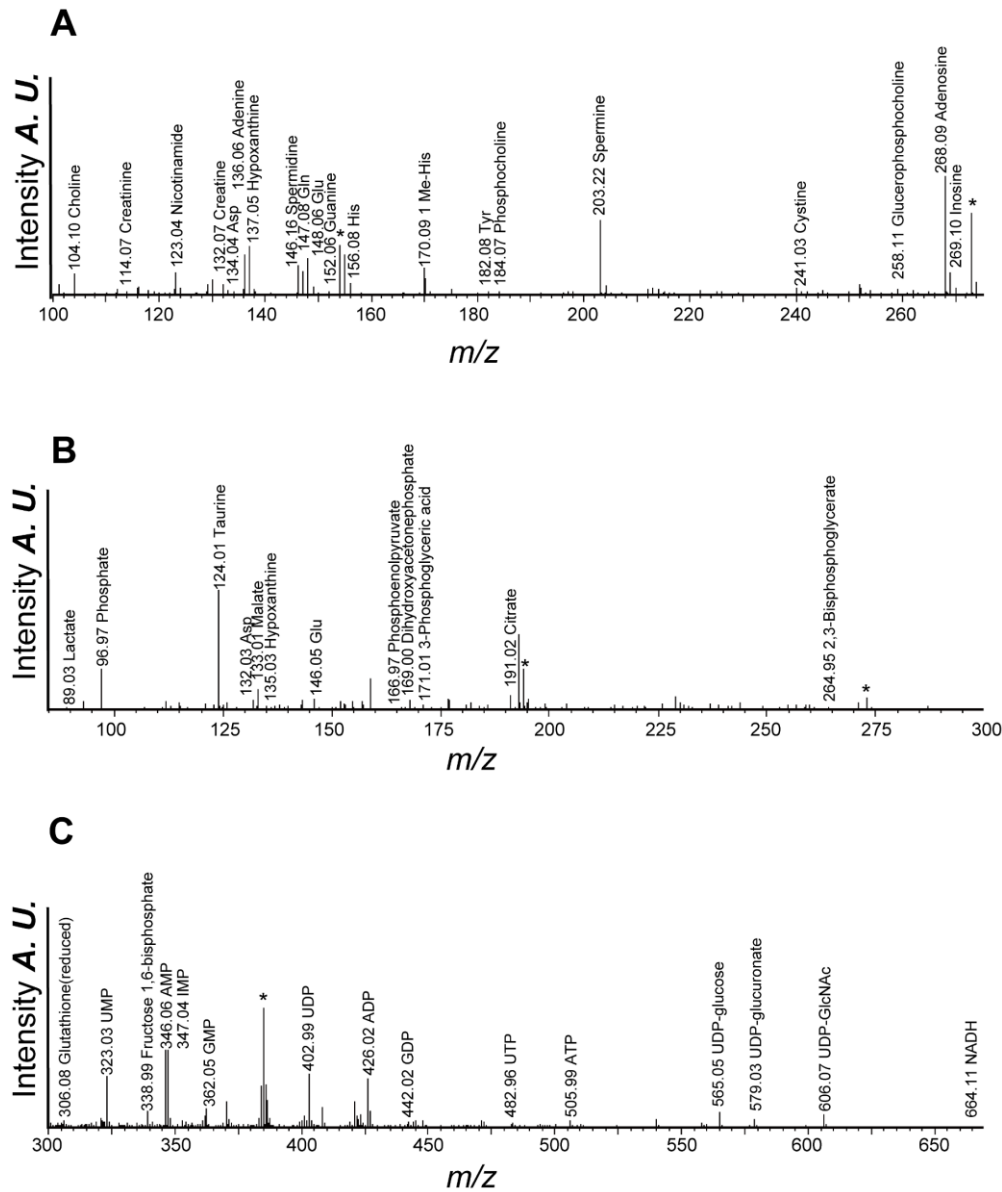

Supplementary Figure 1. Mass spectrum of murine kidney.

(A) A positive ion mode ( $m/z$  100 to  $m/z$  270) mass spectrum of murine kidney. (B) A negative ion mode ( $m/z$  85 to  $m/z$  300) mass spectrum of murine kidney. (C) A negative ion mode ( $m/z$  300 to  $m/z$  670) mass spectrum of murine kidney. Peaks labeled with asterisks are matrix-origin artifacts.

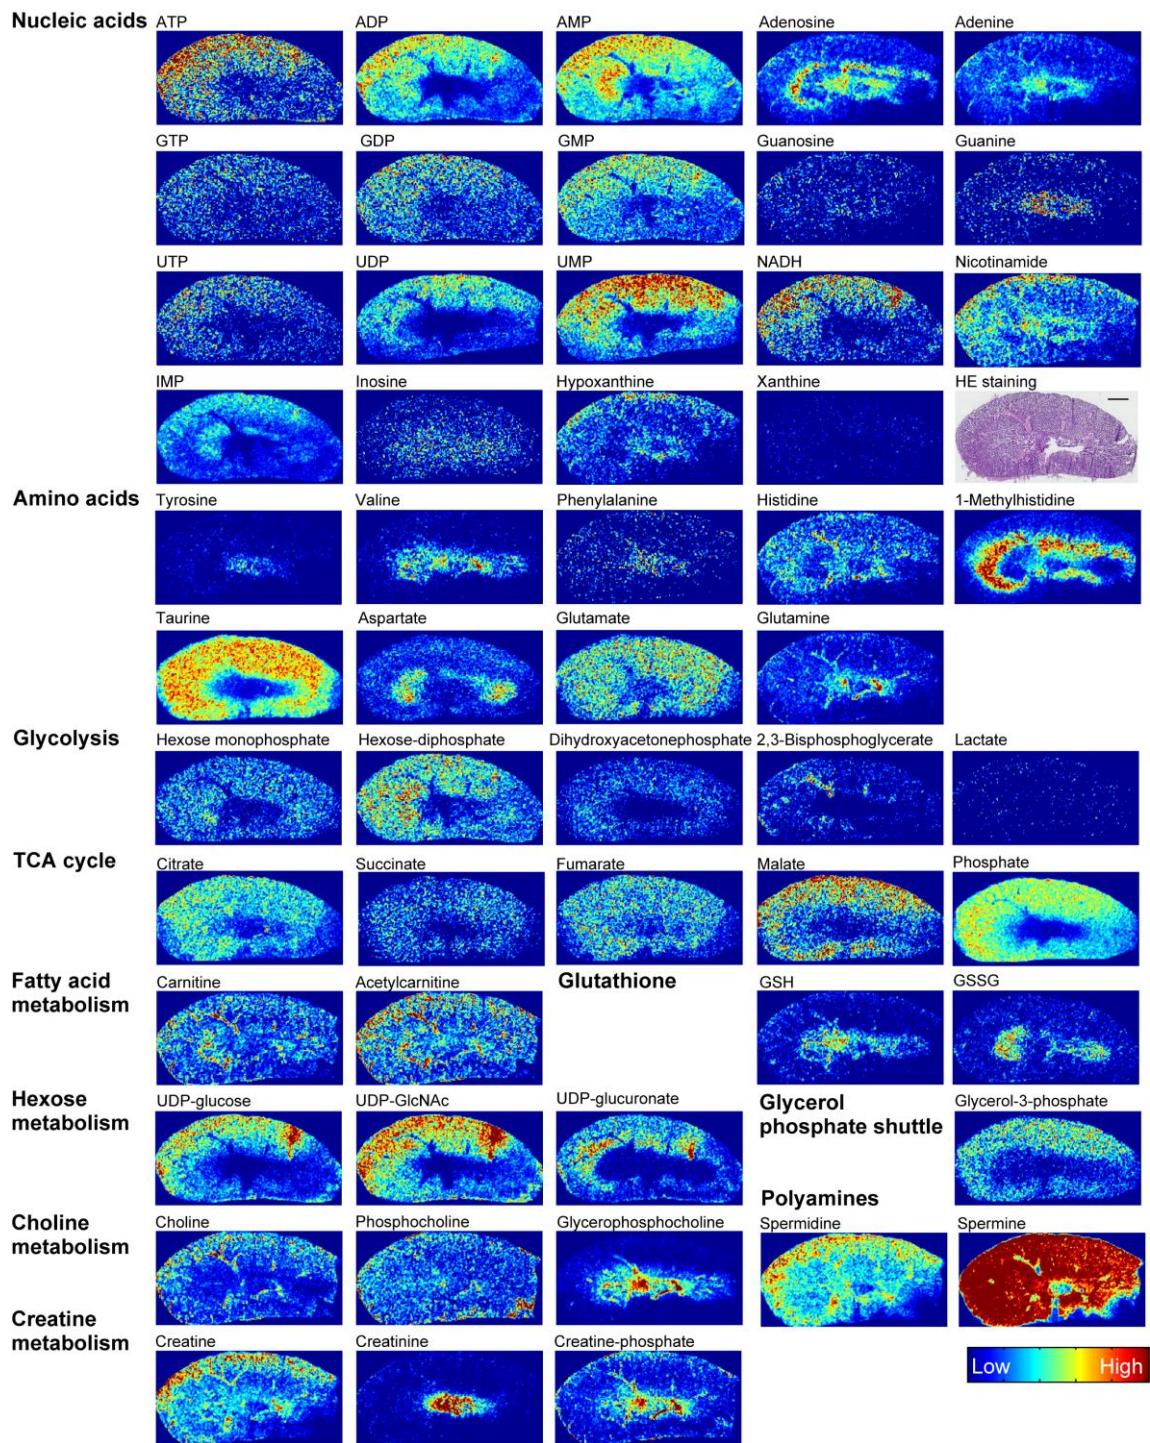

Supplementary Figure 2. Mass spectrometric images of murine kidney

Images were obtained from three sequential sections, two of which were for negative ion mode and another was for positive ion mode. IMP, inosine monophosphate. GSH, reduced glutathione. GSSG, oxidized glutathione. Scale bar: 1mm

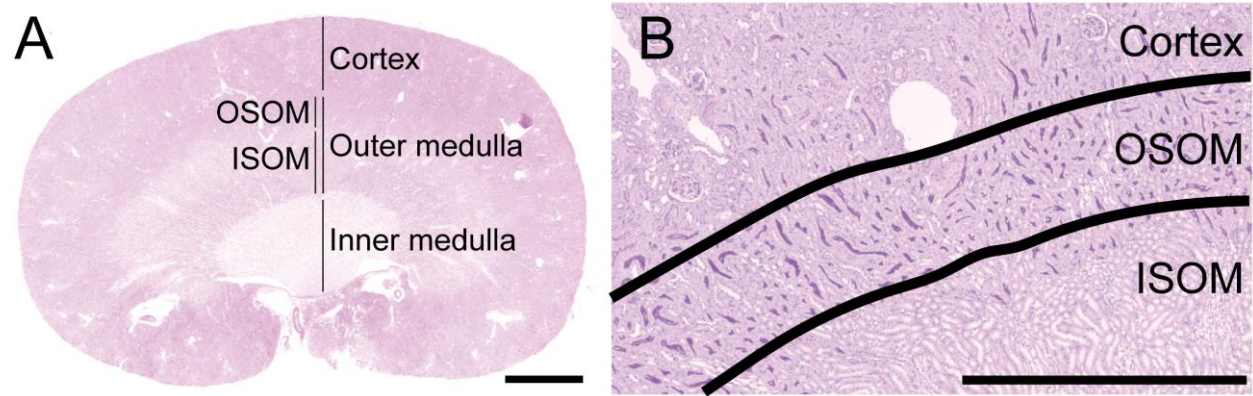

|                           | whole     | cortex      | OSOM        | ISOM        | IM         |
|---------------------------|-----------|-------------|-------------|-------------|------------|
| Volume (mm <sup>3</sup> ) | 181 ± 8.4 | 124 ± 5.9   | 32.8 ± 3.1  | 23.4 ± 1.8  | 3.8 ± 0.2  |
| Relative volume (%)       | 100       | 68.5 ± 2.38 | 18.0 ± 1.55 | 12.9 ± 0.65 | 2.1 ± 0.19 |

Supplementary Figure 3. A PAS-stained tissue sections of murine kidney

A PAS-stained tissue section of murine kidney is shown at (A) a low-power field, and (B) a high-power field. The region of OSOM is outlined by the black lines. The four segments of the kidney (cortex, OSOM, ISOM and IM) were identified by the histological characteristics. (C) Relative volume of each area in murine kidney. n=4 animals for each group. Values are shown as mean ± SEM. OSOM, outer stripes of outer medulla, ISOM, inner stripes of outer medulla. IM, inner medulla. Bar: 1 mm.

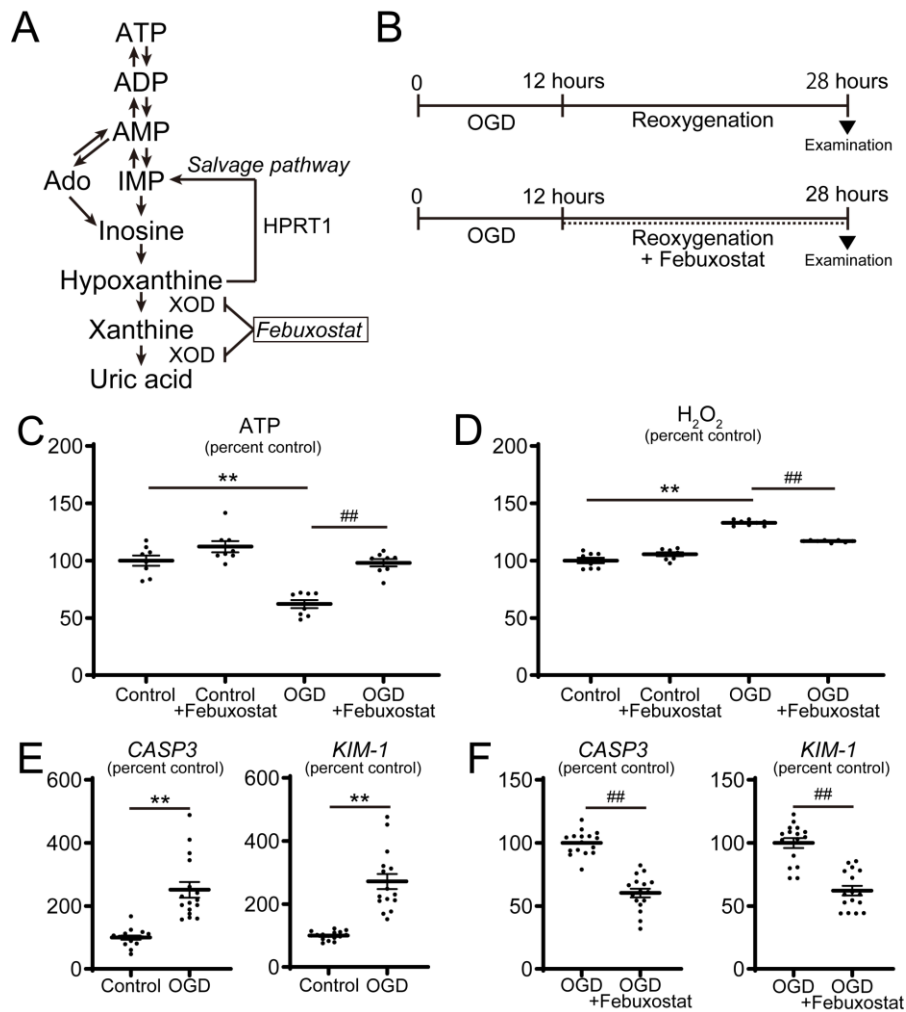

Supplementary Figure 4. Februxostat promotes the re-synthesis of adenylates and suppresses the expression of injury marker genes.

(A) Scheme of the nucleoside salvage pathway. (B) Scheme of the present study. Human kidney-2 (HK-2) cells were exposed to hypoxia (5% CO<sub>2</sub>, 1% O<sub>2</sub>) for 12 hours followed by 16 hours of reoxygenation (5% CO<sub>2</sub>, 21% O<sub>2</sub>). During hypoxia, the culture medium was replaced with DMEM containing no glucose (oxygen and glucose deprivation, OGD). (C) The contents of ATP and total adenylates were measured from cell lysates prepared after 24-hour recovery. Data are shown as relative value against control. n = 8 for each group. (D) The contents of H<sub>2</sub>O<sub>2</sub> were measured after 16 hours of reoxygenation. Data are shown as relative value against control. n = 8 for each group. (E) Gene expression of *CASP3* and *KIM-1* in HK-2 cells. #: *P* < 0.05, ##: *P* < 0.01 control vs. OGD. n = 16 for each group. (F) Gene expression of *CASP3* and *KIM-1* in HK-2 cells. \*\*: *P* < 0.01 control vs. OGD. ##: *P* < 0.01 OGD vs. OGD+Februxostat. NS; not significant (*P* > 0.05). n = 16 for each group. Differences in mean values were statistically analyzed by Student's two-tailed *t* test. HPRT1, hypoxanthine phosphoribosyl transferase 1. Ado, adenosine. XOD, xanthine oxidase.

## [Supplementary Tables]

Supplementary Table 1. Metabolites detected in MALDI-IMS experiments

| Metabolite                | <i>m/z</i> observed | ion                | identification |
|---------------------------|---------------------|--------------------|----------------|
| Citrate                   | 191.019             | [M-H] <sup>-</sup> | Tandem MS      |
| Succinate                 | 117.019             | [M-H] <sup>-</sup> | Tandem MS      |
| Fumarate                  | 115.003             | [M-H] <sup>-</sup> | Tandem MS      |
| Malate                    | 133.015             | [M-H] <sup>-</sup> | Tandem MS      |
| Lactate                   | 89.024              | [M-H] <sup>-</sup> | Tandem MS      |
| Glycerol-3-phosphate      | 171.006             | [M-H] <sup>-</sup> | Tandem MS      |
| Hexose-diphosphate        | 338.988             | [M-H] <sup>-</sup> | Tandem MS      |
| Hexose-phosphate          | 259.022             | [M-H] <sup>-</sup> | Tandem MS      |
| Dihydroxyacetonephosphate | 168.998             | [M-H] <sup>-</sup> | Tandem MS      |
| Phosphate                 | 96.969              | [M-H] <sup>-</sup> | Tandem MS      |
| Aspartate                 | 132.031             | [M-H] <sup>-</sup> | Tandem MS      |
| Glutamate                 | 146.047             | [M-H] <sup>-</sup> | Tandem MS      |
| Glutamine                 | 147.077             | [M+H] <sup>+</sup> | Tandem MS      |
| Taurine                   | 124.011             | [M-H] <sup>-</sup> | Tandem MS      |
| Valine                    | 118.086             | [M+H] <sup>+</sup> | Tandem MS      |
| Tyrosine                  | 182.078             | [M+H] <sup>+</sup> | Tandem MS      |
| Phenylalanine             | 166.087             | [M+H] <sup>+</sup> | Tandem MS      |
| Histidine                 | 156.076             | [M+H] <sup>+</sup> | Tandem MS      |
| 1-Methylhistidine         | 170.090             | [M+H] <sup>+</sup> | Tandem MS      |
| ATP                       | 505.988             | [M-H] <sup>-</sup> | Tandem MS      |
| ADP                       | 426.031             | [M-H] <sup>-</sup> | Tandem MS      |
| AMP                       | 346.094             | [M-H] <sup>-</sup> | Tandem MS      |
| Adenosine                 | 268.099             | [M+H] <sup>+</sup> | Tandem MS      |
| Adenine                   | 136.063             | [M+H] <sup>+</sup> | Tandem MS      |
| GTP                       | 521.983             | [M-H] <sup>-</sup> | Tandem MS      |
| GDP                       | 442.018             | [M-H] <sup>-</sup> | Tandem MS      |
| GMP                       | 362.097             | [M-H] <sup>-</sup> | Tandem MS      |
| Guanosine                 | 284.082             | [M+H] <sup>+</sup> | Tandem MS      |
| Guanine                   | 152.057             | [M+H] <sup>+</sup> | Tandem MS      |
| IMP                       | 347.090             | [M-H] <sup>-</sup> | Tandem MS      |
| Inosine                   | 267.0737            | [M-H] <sup>-</sup> | Tandem MS      |
| Hypoxanthine              | 137.046             | [M+H] <sup>+</sup> | Tandem MS      |
| Xanthine                  | 151.026             | [M-H] <sup>-</sup> | Tandem MS      |

Supplementary Table 1 (continued). Metabolites detected in MALDI-IMS experiments

|                             |         |                    |           |
|-----------------------------|---------|--------------------|-----------|
| UTP                         | 482.961 | [M-H] <sup>-</sup> | Tandem MS |
| UDP                         | 402.996 | [M-H] <sup>-</sup> | Tandem MS |
| UMP                         | 323.049 | [M-H] <sup>-</sup> | Tandem MS |
| UDP-glucose                 | 565.047 | [M-H] <sup>-</sup> | Tandem MS |
| UDP-glucuronate             | 579.026 | [M-H] <sup>-</sup> | Tandem MS |
| UDP-GlcNAc                  | 606.074 | [M-H] <sup>-</sup> | Tandem MS |
| NADH                        | 664.112 | [M-H] <sup>-</sup> | Tandem MS |
| Nicotinamide                | 123.056 | [M+H] <sup>+</sup> | Tandem MS |
| Carnitine                   | 162.113 | [M+H] <sup>+</sup> | Tandem MS |
| Acetylcarnitine             | 204.124 | [M+H] <sup>+</sup> | Tandem MS |
| Glutathione (oxidized)      | 611.144 | [M-H] <sup>-</sup> | Tandem MS |
| Glutathione (reduced)       | 306.076 | [M-H] <sup>-</sup> | Tandem MS |
| Choline                     | 104.107 | M <sup>+</sup>     | Tandem MS |
| Phosphocholine              | 184.070 | [M+H] <sup>+</sup> | Tandem MS |
| Glycerophosphocholine       | 258.104 | [M+H] <sup>+</sup> | Tandem MS |
| 2,3-Bisphosphoglyceric acid | 264.952 | [M-H] <sup>-</sup> | Tandem MS |
| Creatine                    | 132.070 | [M+H] <sup>+</sup> | Tandem MS |
| Creatinine                  | 114.067 | [M+H] <sup>+</sup> | Tandem MS |
| Creatine-phosphate          | 212.044 | [M+H] <sup>+</sup> | Tandem MS |
| Spermidine                  | 146.164 | [M+H] <sup>+</sup> | Tandem MS |
| Spermine                    | 203.218 | [M+H] <sup>+</sup> | Tandem MS |

[M+H]<sup>+</sup> : protonated positive ion, M<sup>+</sup> : permanent cation, [M-H]<sup>-</sup> : deprotonated negative ion. MS: mass spectrometry.

Supplementary Table 2. The regional content of adenine nucleotides, the breakdown products, glutathione and NADH in the kidney on normal condition quantified by metabolome analyses.

|        | Adenine nucleotides ( $\mu\text{M}$ ) |              |              |                |                 | The breakdown products ( $\mu\text{M}$ ) |                |                |               |
|--------|---------------------------------------|--------------|--------------|----------------|-----------------|------------------------------------------|----------------|----------------|---------------|
|        | ATP                                   | ADP          | AMP          | Total          | EC Value        | Adenosine                                | IMP            | Inosine        | Hypoxanthine  |
| Cortex | 3027 $\pm$ 45                         | 638 $\pm$ 14 | 254 $\pm$ 5  | 3919 $\pm$ 62  | 0.85 $\pm$ 0.00 | 25.1 $\pm$ 2.0                           | 71.1 $\pm$ 1.5 | 13.7 $\pm$ 0.1 | 5.5 $\pm$ 0.1 |
| OSOM   | 2571 $\pm$ 91                         | 540 $\pm$ 28 | 231 $\pm$ 12 | 3342 $\pm$ 128 | 0.85 $\pm$ 0.00 | 85.8 $\pm$ 9.4                           | 50.2 $\pm$ 3.5 | 13.3 $\pm$ 0.2 | 4.7 $\pm$ 0.2 |
| ISOM   | 2195 $\pm$ 255                        | 541 $\pm$ 86 | 287 $\pm$ 28 | 3023 $\pm$ 368 | 0.81 $\pm$ 0.01 | 33.6 $\pm$ 4.3                           | 92.3 $\pm$ 9.5 | 12.7 $\pm$ 0.3 | 4.8 $\pm$ 0.4 |
| IM     | 1139 $\pm$ 148                        | 101 $\pm$ 24 | 115 $\pm$ 21 | 1300 $\pm$ 209 | 0.86 $\pm$ 0.03 | 18.1 $\pm$ 10.0                          | 33.2 $\pm$ 3.6 | 13.5 $\pm$ 1.2 | 7.7 $\pm$ 1.2 |

|        | GSH ( $\mu\text{M}$ ) | GSSG ( $\mu\text{M}$ ) | NADH ( $\mu\text{M}$ ) |
|--------|-----------------------|------------------------|------------------------|
| Cortex | 71.0 $\pm$ 1.0        | 2009 $\pm$ 105         | 56.8 $\pm$ 1.3         |
| OSOM   | 68.6 $\pm$ 2.2        | 1745 $\pm$ 135         | 49.6 $\pm$ 1.6         |
| ISOM   | 70.3 $\pm$ 6.7        | 3231 $\pm$ 643         | 51.9 $\pm$ 5.3         |
| IM     | 56.7 $\pm$ 6.8        | 1753 $\pm$ 372         | 35.4 $\pm$ 18.5        |

The values are shown as mean  $\pm$  SEM. OSOM, outer stripes of outer medulla. ISOM, inner stripes of outer medulla. IM, inner medulla. ATP, adenosine triphosphate. ADP, adenosine diphosphate. AMP, adenosine monophosphate. Total, total adenylates (ATP+ADP+AMP). EC value, energy charge value  $((\text{ATP} + 1/2 \text{ADP})/(\text{ATP}+\text{ADP}+\text{AMP}))$ . IMP, inosine monophosphate. GSH, reduced glutathione. GSSG, oxidized glutathione. n=9. The results are also shown in Figure 2 and 4 as bar graphs.

Supplementary Table 3. The regional content of adenine nucleotides and the breakdown products in the kidney on 1 minute ischemic condition quantified by metabolome analyses.

|        | Adenine nucleotides ( $\mu\text{M}$ ) |               |               |                | EC Value        | The breakdown products ( $\mu\text{M}$ ) |                  |                |                 |
|--------|---------------------------------------|---------------|---------------|----------------|-----------------|------------------------------------------|------------------|----------------|-----------------|
|        | ATP                                   | ADP           | AMP           | Total          |                 | Adenosine                                | IMP              | Inosine        | Hypoxanthine    |
| Cortex | 1631 $\pm$ 11                         | 984 $\pm$ 10  | 984 $\pm$ 10  | 3517 $\pm$ 23  | 0.59 $\pm$ 0.00 | 54.8 $\pm$ 3.9                           | 315.3 $\pm$ 2.7  | 54.8 $\pm$ 0.5 | 48.5 $\pm$ 1.1  |
| OSOM   | 1441 $\pm$ 61                         | 852 $\pm$ 15  | 851 $\pm$ 15  | 3019 $\pm$ 98  | 0.60 $\pm$ 0.01 | 84.4 $\pm$ 13.3                          | 205.8 $\pm$ 10.2 | 53.9 $\pm$ 1.3 | 37.6 $\pm$ 1.6  |
| ISOM   | 1646 $\pm$ 109                        | 1353 $\pm$ 45 | 1353 $\pm$ 45 | 4035 $\pm$ 222 | 0.53 $\pm$ 0.03 | 92.0 $\pm$ 9.4                           | 297.5 $\pm$ 12.1 | 53.4 $\pm$ 1.7 | 53.0 $\pm$ 4.0  |
| IM     | 849 $\pm$ 211                         | 554 $\pm$ 171 | 554 $\pm$ 171 | 1657 $\pm$ 463 | 0.59 $\pm$ 0.04 | 112.3 $\pm$ 23.0                         | 134.4 $\pm$ 32.7 | 51.3 $\pm$ 2.7 | 88.9 $\pm$ 14.2 |

The values are shown as mean  $\pm$  SEM. OSOM, outer stripes of outer medulla. ISOM, inner stripes of outer medulla. IM, inner medulla. Total, total adenylylates (ATP+ADP+AMP). EC value, energy charge value ((ATP + 1/2 ADP)/(ATP+ADP+AMP)). IMP, inosine monophosphate. n=5. The results are also shown in Figure 2 as bar graphs.

Supplementary Table 4. The regional content of adenine nucleotides, the breakdown products, glutathione and NADH in the kidney on 10 minutes ischemic condition quantified by metabolome analyses.

|        | Adenine nucleotides ( $\mu\text{M}$ ) |               |                |                |                  | The breakdown products ( $\mu\text{M}$ ) |                |                  |                  |
|--------|---------------------------------------|---------------|----------------|----------------|------------------|------------------------------------------|----------------|------------------|------------------|
|        | ATP                                   | ADP           | AMP            | Total          | EC Value         | Adenosine                                | IMP            | Inosine          | Hypoxanthine     |
| Cortex | 466 $\pm$ 21                          | 408 $\pm$ 26  | 1233 $\pm$ 84  | 2107 $\pm$ 130 | 0.32 $\pm$ 0.010 | 73.5 $\pm$ 3.7                           | 627 $\pm$ 35   | 250.1 $\pm$ 11.9 | 261.4 $\pm$ 13.8 |
| OSOM   | 461 $\pm$ 26                          | 403 $\pm$ 26  | 1452 $\pm$ 88  | 2315 $\pm$ 126 | 0.29 $\pm$ 0.01  | 121.2 $\pm$ 3.7                          | 503 $\pm$ 32   | 227.9 $\pm$ 13.9 | 178.0 $\pm$ 32.5 |
| ISOM   | 673 $\pm$ 137                         | 728 $\pm$ 122 | 2738 $\pm$ 325 | 4139 $\pm$ 580 | 0.24 $\pm$ 0.01  | 109.4 $\pm$ 13.7                         | 1187 $\pm$ 148 | 283.7 $\pm$ 36.2 | 267.5 $\pm$ 42.0 |
| IM     | 318 $\pm$ 44                          | 198 $\pm$ 46  | 853 $\pm$ 221  | 1369 $\pm$ 280 | 0.33 $\pm$ 0.06  | 134.5 $\pm$ 35.0                         | 507 $\pm$ 111  | 303.3 $\pm$ 62.3 | 409.5 $\pm$ 96.4 |

  

|        | GSH ( $\mu\text{M}$ ) | GSSG ( $\mu\text{M}$ ) | NADH ( $\mu\text{M}$ ) |
|--------|-----------------------|------------------------|------------------------|
| Cortex | 131.5 $\pm$ 7.5       | 2129 $\pm$ 180         | 267.0 $\pm$ 16.7       |
| OSOM   | 108.0 $\pm$ 2.9       | 1506 $\pm$ 172         | 275.9 $\pm$ 12.9       |
| ISOM   | 124.4 $\pm$ 29.8      | 3218 $\pm$ 890         | 463.9 $\pm$ 85.4       |
| IM     | 135.8 $\pm$ 52.6      | 2947 $\pm$ 1163        | 114.6 $\pm$ 31.4       |

The values are shown as mean  $\pm$  SEM. OSOM, outer stripes of outer medulla. ISOM, inner stripes of outer medulla. IM, inner medulla. Total, total adenylates (ATP+ADP+AMP). EC value, energy charge value  $((\text{ATP} + 1/2 \text{ADP})/(\text{ATP}+\text{ADP}+\text{AMP}))$ . IMP, inosine monophosphate. GSH, reduced glutathione. GSSG, oxidized glutathione. n=4. The results are also shown in Figure 2 and 4 as bar graphs.

Supplementary Table 5. The regional content of adenine nucleotides and the breakdown products in the sham operated kidney quantified by metabolome analyses.

|        | Adenine nucleotides ( $\mu\text{M}$ ) |              |              |                |                 | The breakdown products ( $\mu\text{M}$ ) |                  |                |                |
|--------|---------------------------------------|--------------|--------------|----------------|-----------------|------------------------------------------|------------------|----------------|----------------|
|        | ATP                                   | ADP          | AMP          | Total          | EC Value        | Adenosine                                | IMP              | Inosine        | Hypoxanthine   |
| Cortex | 3097 $\pm$ 52                         | 766 $\pm$ 11 | 405 $\pm$ 7  | 4267 $\pm$ 69  | 0.82 $\pm$ 0.00 | 37.5 $\pm$ 1.8                           | 141.9 $\pm$ 2.6  | 25.9 $\pm$ 0.4 | 12.5 $\pm$ 0.3 |
| OSOM   | 2257 $\pm$ 137                        | 559 $\pm$ 31 | 329 $\pm$ 9  | 3146 $\pm$ 177 | 0.81 $\pm$ 0.00 | 72.4 $\pm$ 8.0                           | 94.4 $\pm$ 2.0   | 25.0 $\pm$ 0.7 | 10.7 $\pm$ 0.7 |
| ISOM   | 2027 $\pm$ 199                        | 665 $\pm$ 42 | 438 $\pm$ 30 | 3130 $\pm$ 269 | 0.75 $\pm$ 0.01 | 49.3 $\pm$ 4.5                           | 134.8 $\pm$ 11.2 | 24.1 $\pm$ 1.5 | 11.3 $\pm$ 0.6 |
| IM     | 1001 $\pm$ 127                        | 114 $\pm$ 25 | 146 $\pm$ 35 | 1261 $\pm$ 163 | 0.84 $\pm$ 0.02 | 134.5 $\pm$ 35.0                         | 45.5 $\pm$ 10.3  | 21.8 $\pm$ 1.6 | 18.3 $\pm$ 3.9 |

The values are shown as mean  $\pm$  SEM. OSOM, outer stripes of outer medulla. ISOM, inner stripes of outer medulla. IM, inner medulla. Total, total adenylates (ATP+ADP+AMP). EC value, energy charge value ((ATP + 1/2 ADP)/(ATP+ADP+AMP)). IMP, inosine monophosphate. n=5 in each group. The results are also shown in Figure 3 as bar graphs.

Supplementary Table 6. The regional content of adenine nucleotides, the breakdown products, glutathione and NADH in the kidney after 10 minutes ischemia and 24 hours reperfusion quantified by metabolome analyses.

|        | Adenine nucleotides ( $\mu\text{M}$ ) |              |              |                |                 | The breakdown products ( $\mu\text{M}$ ) |                 |                |                |
|--------|---------------------------------------|--------------|--------------|----------------|-----------------|------------------------------------------|-----------------|----------------|----------------|
|        | ATP                                   | ADP          | AMP          | Total          | EC Value        | Adenosine                                | IMP             | Inosine        | Hypoxanthine   |
| Cortex | 2332 $\pm$ 40                         | 664 $\pm$ 14 | 377 $\pm$ 10 | 3302 $\pm$ 99  | 0.79 $\pm$ 0.00 | 38.3 $\pm$ 2.2                           | 113.4 $\pm$ 1.3 | 18.9 $\pm$ 0.3 | 11.7 $\pm$ 0.4 |
| OSOM   | 1681 $\pm$ 82                         | 480 $\pm$ 29 | 320 $\pm$ 15 | 2542 $\pm$ 136 | 0.77 $\pm$ 0.00 | 80.2 $\pm$ 5.5                           | 70.1 $\pm$ 4.8  | 19.2 $\pm$ 0.5 | 10.1 $\pm$ 0.3 |
| ISOM   | 1826 $\pm$ 91                         | 646 $\pm$ 40 | 478 $\pm$ 29 | 3064 $\pm$ 169 | 0.73 $\pm$ 0.00 | 54.1 $\pm$ 5.7                           | 143.3 $\pm$ 6.7 | 21.0 $\pm$ 0.8 | 12.6 $\pm$ 1.5 |
| IM     | 831 $\pm$ 150                         | 68 $\pm$ 7   | 147 $\pm$ 27 | 1074 $\pm$ 189 | 0.83 $\pm$ 0.00 | 52.6 $\pm$ 7.8                           | 32.1 $\pm$ 5.5  | 23.4 $\pm$ 2.7 | 19.3 $\pm$ 4.3 |

  

|        | GSH ( $\mu\text{M}$ ) | GSSG ( $\mu\text{M}$ ) | NADH ( $\mu\text{M}$ ) |
|--------|-----------------------|------------------------|------------------------|
| Cortex | 38.5 $\pm$ 0.3        | 1293 $\pm$ 35          | 265.2 $\pm$ 5.1        |
| OSOM   | 38.2 $\pm$ 1.3        | 1215 $\pm$ 53          | 246.6 $\pm$ 8.9        |
| ISOM   | 44.3 $\pm$ 2.0        | 2122 $\pm$ 206         | 203.7 $\pm$ 17.3       |
| IM     | 39.6 $\pm$ 2.3        | 1454 $\pm$ 179         | 87.8 $\pm$ 12.2        |

The values are shown as mean  $\pm$  SEM. OSOM, outer stripes of outer medulla. ISOM, inner stripes of outer medulla. IM, inner medulla. Total, total adenylates (ATP+ADP+AMP). EC value, energy charge value  $((\text{ATP} + 1/2 \text{ADP})/(\text{ATP}+\text{ADP}+\text{AMP}))$ . IMP, inosine monophosphate. GSH, reduced glutathione. GSSG, oxidized glutathione. n=5 for adenylates, n=14 for glutathione and NADH in each group. The results are also shown in Figure 3 and 4 as bar graphs.

Supplementary Table 7. The regional content of adenine nucleotides, the breakdown products, glutathione and NADH in the kidney after 10 minutes ischemia and 24 hours reperfusion with febuxostat treatment quantified by metabolome analyses.

|        | Adenine nucleotides ( $\mu\text{M}$ ) |              |              |                |                 | The breakdown products ( $\mu\text{M}$ ) |                  |                |                |
|--------|---------------------------------------|--------------|--------------|----------------|-----------------|------------------------------------------|------------------|----------------|----------------|
|        | ATP                                   | ADP          | AMP          | Total          | EC Value        | Adenosine                                | IMP              | Inosine        | Hypoxanthine   |
| Cortex | 3402 $\pm$ 58                         | 737 $\pm$ 14 | 297 $\pm$ 6  | 4554 $\pm$ 72  | 0.85 $\pm$ 0.00 | 23.1 $\pm$ 0.6                           | 117.9 $\pm$ 5.0  | 18.3 $\pm$ 0.1 | 40.9 $\pm$ 1.6 |
| OSOM   | 2309 $\pm$ 202                        | 524 $\pm$ 24 | 246 $\pm$ 12 | 3158 $\pm$ 240 | 0.83 $\pm$ 0.01 | 31.0 $\pm$ 1.6                           | 79.1 $\pm$ 6.9   | 18.4 $\pm$ 0.4 | 27.1 $\pm$ 2.4 |
| ISOM   | 3259 $\pm$ 322                        | 703 $\pm$ 65 | 357 $\pm$ 17 | 4434 $\pm$ 385 | 0.83 $\pm$ 0.01 | 25.3 $\pm$ 2.0                           | 115.1 $\pm$ 16.5 | 18.0 $\pm$ 0.6 | 38.4 $\pm$ 6.0 |
| IM     | 1595 $\pm$ 175                        | 219 $\pm$ 35 | 176 $\pm$ 17 | 2048 $\pm$ 155 | 0.85 $\pm$ 0.02 | 23.1 $\pm$ 4.4                           | 58.9 $\pm$ 10.3  | 21.0 $\pm$ 1.1 | 62.9 $\pm$ 6.8 |

  

|        | GSH ( $\mu\text{M}$ ) | GSSG ( $\mu\text{M}$ ) | NADH ( $\mu\text{M}$ ) |
|--------|-----------------------|------------------------|------------------------|
| Cortex | 198.7 $\pm$ 1.9       | 1344 $\pm$ 33          | 332.9 $\pm$ 5.5        |
| OSOM   | 212.1 $\pm$ 7.3       | 1468 $\pm$ 61          | 310.9 $\pm$ 11.5       |
| ISOM   | 259.9 $\pm$ 11.6      | 2721 $\pm$ 217         | 311.2 $\pm$ 18.2       |
| IM     | 256.1 $\pm$ 13.3      | 1589 $\pm$ 155         | 158.7 $\pm$ 16.4       |

The values are shown as mean  $\pm$  SEM. OSOM, outer stripes of outer medulla. ISOM, inner stripes of outer medulla. IM, inner medulla. Total, total adenylates (ATP+ADP+AMP). EC value, energy charge value  $((\text{ATP} + 1/2 \text{ADP})/(\text{ATP}+\text{ADP}+\text{AMP}))$ . IMP, inosine monophosphate. GSH, reduced glutathione. GSSG, oxidized glutathione. n=5 for adenylates, n=12 for glutathione and NADH in each group. The results are also shown in Figure 3 and 4 as bar graphs.

Supplementary Table 8. The content of glutathione and NADH in the whole kidney quantified by metabolome analyses.

|                        | GSH ( $\mu\text{M}$ ) | GSSG ( $\mu\text{M}$ ) | NADH ( $\mu\text{M}$ ) |
|------------------------|-----------------------|------------------------|------------------------|
| Intact                 | 25.7 $\pm$ 9.6        | 2111.8 $\pm$ 193.7     | 54.5 $\pm$ 6.7         |
| 10 minutes<br>ischemia | 126.5 $\pm$ 31.2      | 2164.0 $\pm$ 197.4     | 290.4 $\pm$ 44.3       |
| IR                     | 39.2 $\pm$ 25.6       | 1387.7 $\pm$ 152.8     | 250.4 $\pm$ 61.4       |
| IRF                    | 76.0 $\pm$ 24.3       | 1545.9 $\pm$ 151.6     | 322.6 $\pm$ 80.2       |

The values are shown as mean  $\pm$  SEM. GSH, reduced glutathione. GSSG, oxidized glutathione. n=5 in each group.

Supplementary Table 9. The primer sequences used in the real-time PCR experiment.

| Gene         | Forward                   | Reverse                   |
|--------------|---------------------------|---------------------------|
| <i>CASP3</i> | AAGGCAGAGCCATGGACCAC      | CTGGCAGCATCATCCACACATAC   |
| <i>KIM-1</i> | AGCTGTGTCTGACAGTGGCGTA    | GAACAGTCGTGACGGTTGGAA     |
| <i>HPRT1</i> | GGCAGTATAATCCAAAGATGGTCAA | GTCAAGGGCATATCCTACAACAAAC |
| <i>RPS18</i> | TTTGCGAGTACTCAACACCAACATC | GAGCATATCTTCGGCCCACAC     |

*CASP3*, caspase 3, *KIM-1*, kidney injury molecule 1. *HPRT1*, hypoxanthine phosphoribosyl transferase 1, *RPS18*, *Homo sapiens* ribosomal protein S18.
